# Supplementary material for: A double negative cascade mediated by epigenetic modifications of EFD (Exine Formation Defect) to HB21 coordinates anther development in plant
Source: Research Square preprint supplement (doi:10.21203/rs.3.rs-2923664/v1), 2023-05-19
Supplement: Supplementary file 1 [file d58dd229ae8a5382459b8f7d.docx]

**Supporting Information**

**
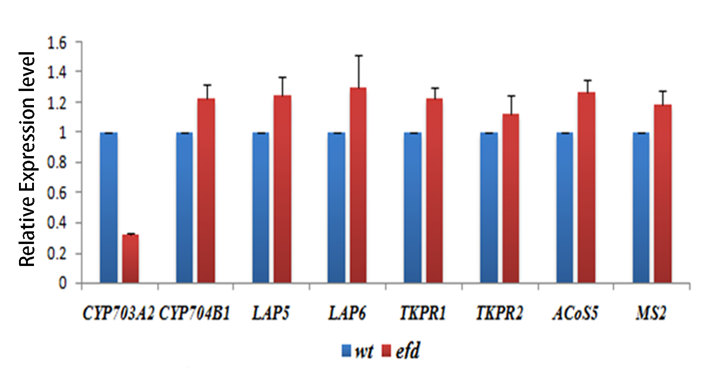
**

**Figure S1. Expression of eight sporopollenin synthesis related genes in wild type and *efd*.** The expression of *CYP703A2* was significantly down-regulated in *efd* compared with that in the wild type. The other seven crucial sporopollenin synthesis related genes showed similar expression level in wild type and *efd*.

**
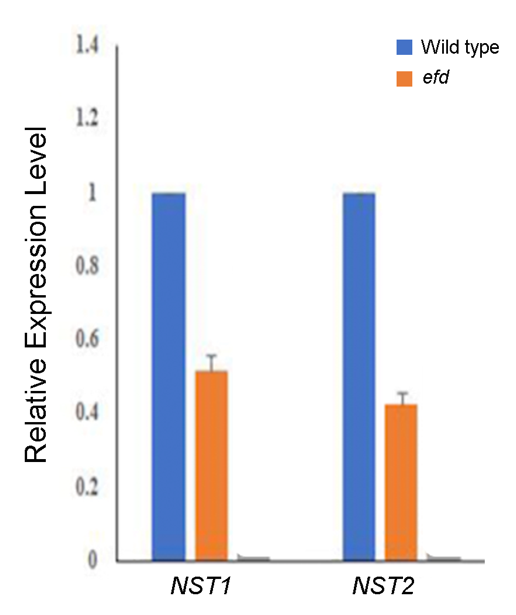
**

**Figure S2. Expression of *NST1* and *NST2* in the wild type and *efd*.** The expression of *NST1* and *NST2* were significantly down-regulated in *efd*.

**
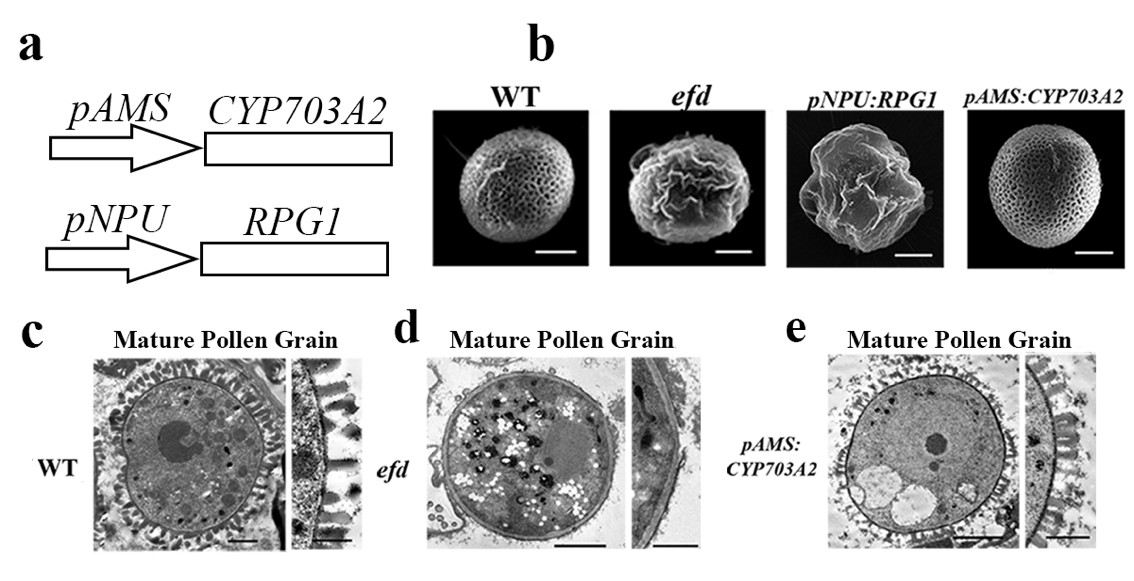
**

**Figure S3. The pollen phenotype of the rescue constructions of *CYP703A2* and *RPG1/SWEET8*** (a), diagrams of constructs: *CYP703A2* was constructed under the *AMS* promoter, and *RPG1* was constructed under the *NPU* promoter. (b), mature pollen grain observation of wild type, *efd*, and the *pNPU: RPG1/SWEET8*. No pollen grains were found in the *pNPU: RPG1/SWEET8* and the *pAMS: CYP703A2* transgenic plants. Bars=10μm. (c)-(e), TEM observations of the mature pollen grains of wild type, *efd* and *pAMS: CYP703A2*, respectively. The *pAMS: CYP703A2* pollen wall showed obviously restored wall pattern similar to that of the wild type pollen wall. Bars=1μm.

**
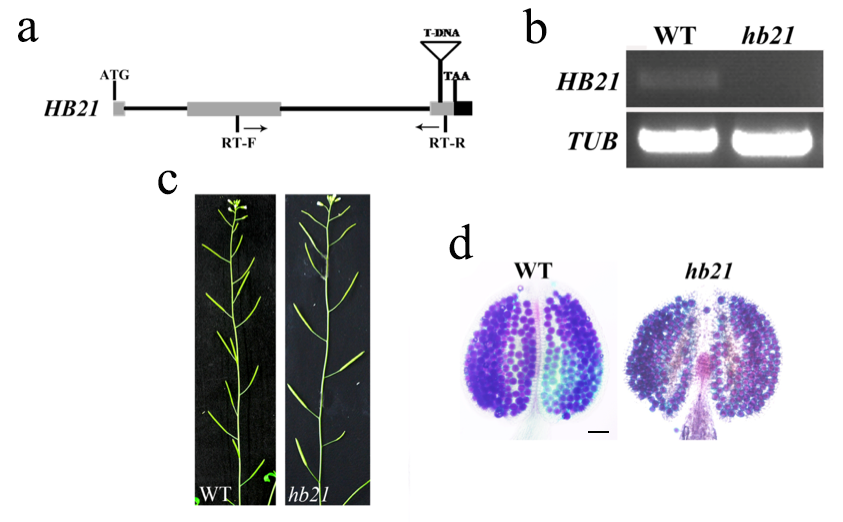
**

**Figure S4. Characterization of *HB21* gene and its knockout mutant.** (a), gene structure of *HB21*.The T-DNA location and the identification primers of T-DNA insertion are noted on the gene structure. (b), amplification of *HB21* transcripts in both wild type and *hb21* buds. *hb21* was a knockout mutant. (c), *hb21* mutant showed normal fertility in compare with the wild type. (d), the *hb21* mutant can produce normal pollen grains in compare with the wild type. Bar=20μm

**Figure S5. Fertility analysis of wild type, *efd* and *efd hb21*** (A), statistics of seed sets per silique in wild type, *efd* and *efd hb21*. The seed production was significantly restored in *efd hb21* compared with that in the *efd* single mutant. (B), statistics of pollen production per anther in wild type, *efd* and *efd hb21*. The *efd hb21* double mutant can produce the normal number of pollen grains which is similar to that in the wild type.
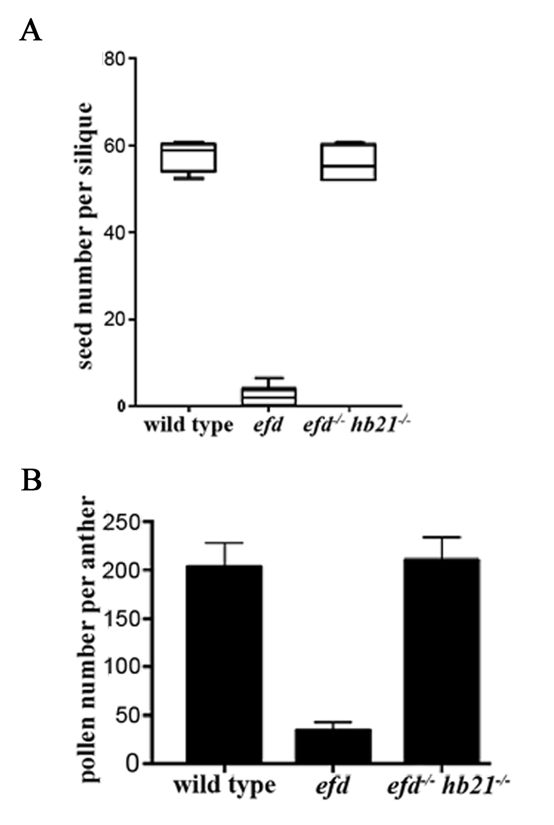


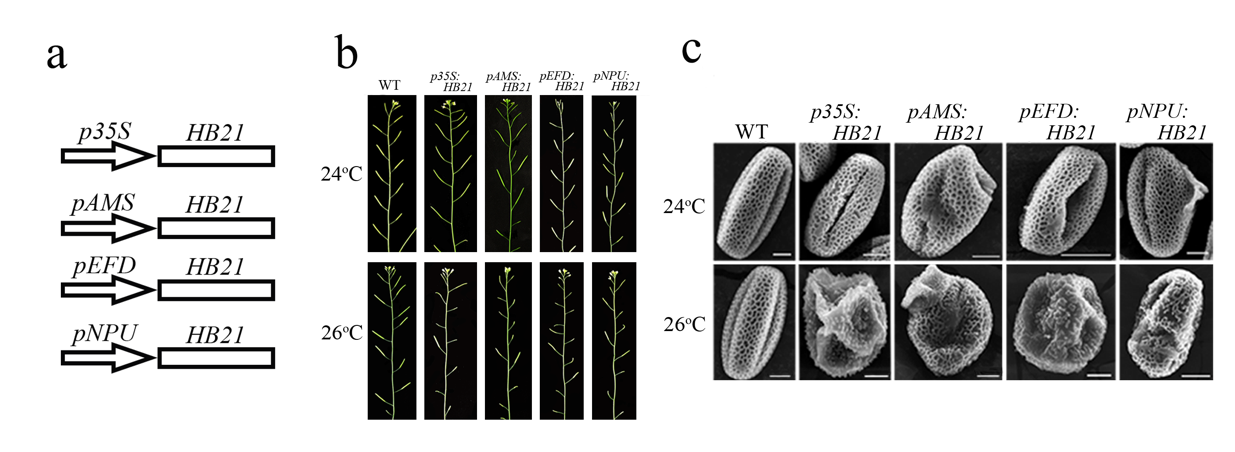


**Figure S6. Fertility and pollen wall observations of the constructive and tissue-specific *HB21* over-expression lines.** (a), the diagrams of four constructs over-expressing *HB21* including: *p35S:HB21* (constructive promoter), *pAMS:HB21* (tapetum-specific promoter), *pEFD:HB21* (tapetum and microsporocyte-specific promoter) and *pNPU:HB21* (microsporocyte-specific promoter). (b), the fertility images of the transgenic lines under 24oC and 26oC, respectively. The fertility of these lines were similar to the wild type under 24oC, while it is significantly reduced under 26oC. (c), the SEM observations of pollen surface of these transgenic lines. The pollen wall of these lines was normal under 24oC. However, it became defective under 26oC. Bars=10μm.


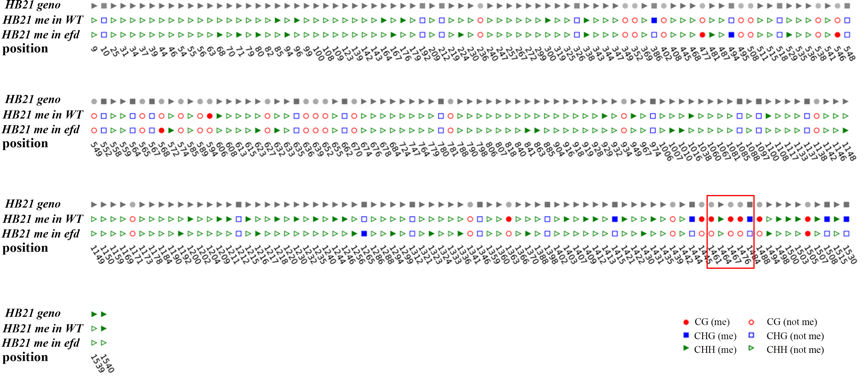


**Figure S7. Cytosine methylation pattern of *HB21* genomic sequence in wild type and *efd*.** The distribution of cytosine methylation was significantly altered in *efd*. The number of the methylated cytosine was largely reduced. Particularly, the 1461st, 1464th , 1467th (in the red frame) and 1476th cytosine lost their methylation in *efd*.


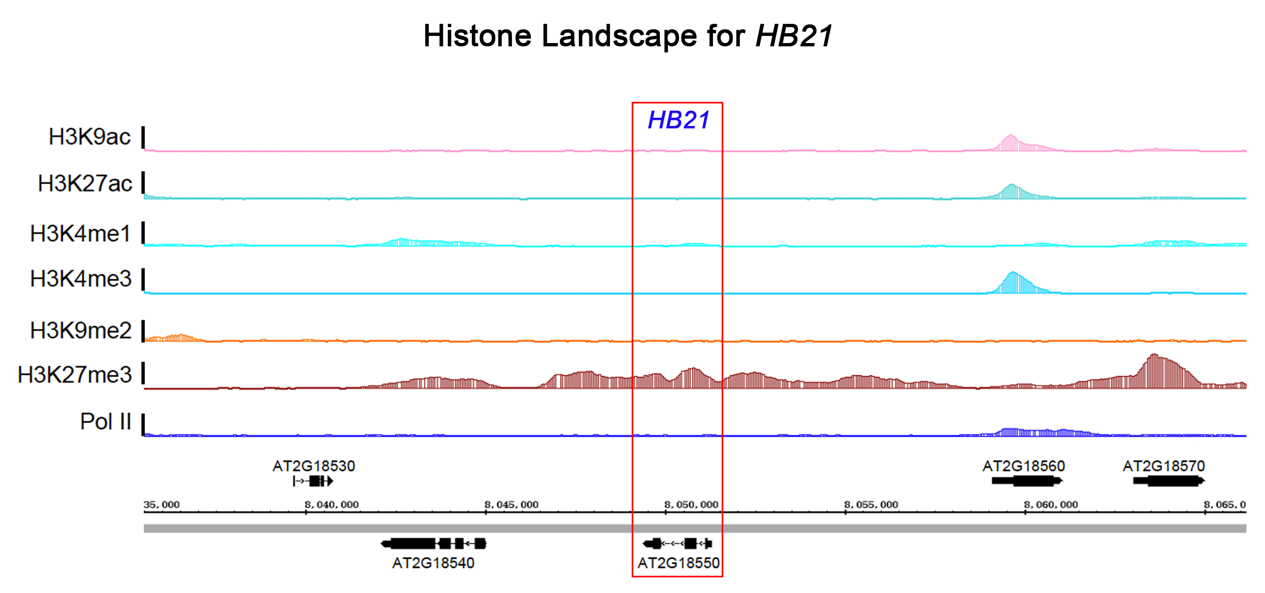


**Figure S8. Histone Landscape for *HB21.*** The H3K27me3 was highly deposited on the chromatin areas including *HB21*. Data was obtained from the study of Zhao et al., 2022.


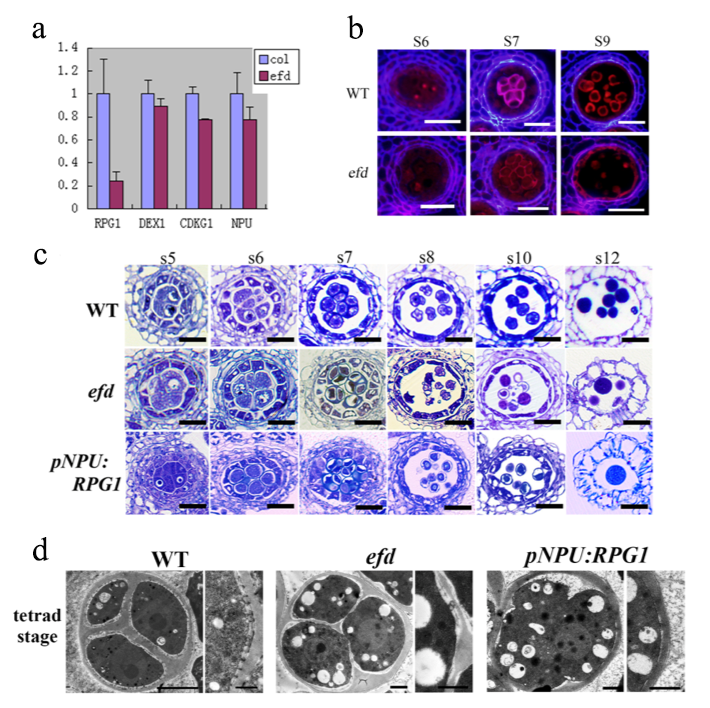


**Figure. S9 Pollen wall development in *pNPU:RPG1* lines.** (a) Relative expression of the critical pollen wall pattern related genes. *RPG1* was significantly down-regulated in *efd* compared with the wild type, while other crucial pollen wall pattern-related genes showed normal expression level in comparison with the wild type. (b) The Tinopal/DIOC2 staining of wild type and *efd* anthers. At tetrad stage, the wild type tetrad can be stained purple, indicating that the primexine occurred surrounding microspores in tetrads, while the *efd* tetrads failed to be stained purple. This indicates that the primexine formation in *efd* is defective. (c) Semi-thin slices of wild type, *efd* and the *pNPU: RPG1* transgenic plant anthers during pollen development. The tetrads can be normally produced in the *pNPU: RPG1* transgenic lines, but the pollen were still mostly ruptured similar to that in *efd*. Bars=50μm (d) TEM observation of wild type, *efd* and *pNPU: RPG1* tetrads. The primexine cannot be observed surrounding the *efd* microspores in tetrads. The *pNPU: RPG1* failed to rescue the primexine defect. Bars=1μm
